# Supplementary material
Source: publisher figshare collection journal article supplement (https://acs.figshare.com/ndownloader/files/3601026)
Supplement: Supplementary file 1 [file 3601026]

## Supporting information

# Electrocatalysis of Ethanol on Pd Electrode in Alkaline Media: an *in situ* ATR-SEIRAS Study

Yao-Yue Yang,<sup>a</sup> Jie Ren,<sup>b</sup> Qiao-Xia Li,<sup>c</sup> Zhi-You Zhou,<sup>\* b</sup> Shi-Gang Sun,<sup>b</sup> Wen-Bin Cai<sup>\*a</sup>

<sup>a</sup>Shanghai Key Laboratory of Molecular Catalysis and Innovative Materials,  
Collaborative Innovation Centre for Energy Materials, Department of Chemistry,  
Fudan University, Shanghai 200433, China

<sup>b</sup>State Key Laboratory of Physical Chemistry of Solid Surfaces, Department of  
Chemistry, College of Chemistry and Chemical Engineering, School of Energy  
Research, Xiamen University, Xiamen 361005, China

<sup>c</sup>College of Environmental and Chemical Engineering, Shanghai University of  
Electric Power, Shanghai, 200090, China

Corresponding Author

\* E-mail: wbc@fudan.edu.cn (WBC); zhouzy@xmu.edu.cn (ZYZ)

1. OCP-t profiles for surface dissociation on Pd electrode

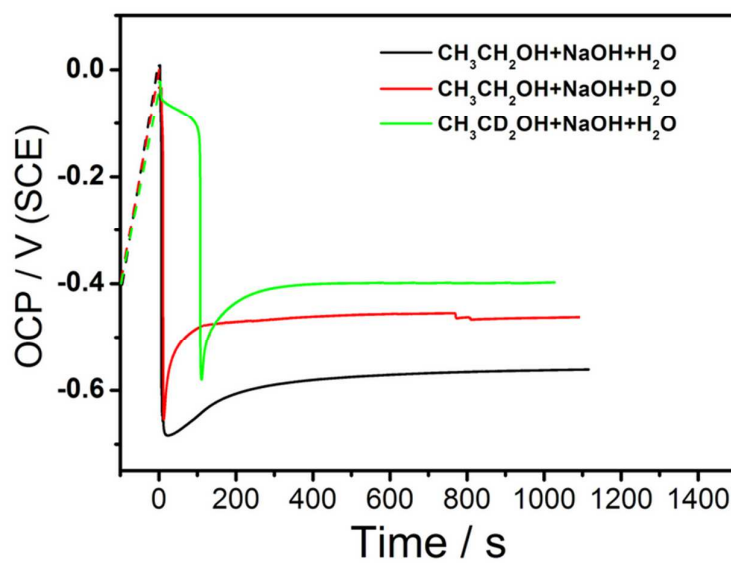

Figure S1. OCP-t profiles for  $\text{CH}_3\text{CH}_2\text{OH}$  and  $\text{CH}_3\text{CD}_2\text{OH}$  surface dissociation on Pd electrode in NaOH  $\text{H}_2\text{O}$  or  $\text{D}_2\text{O}$  solution

## 2. H-D kinetic isotope effect for EOR on Pd in NaOH solution

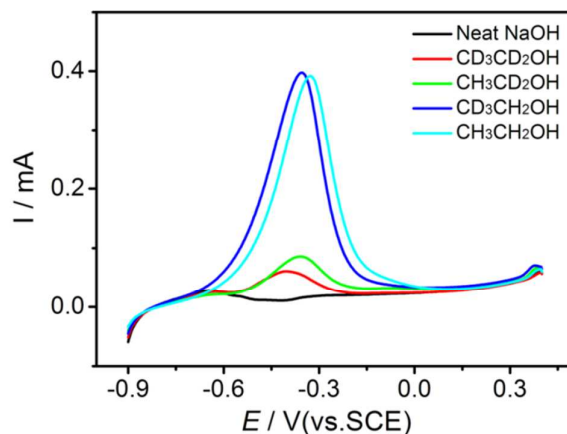

Figure S2. Cyclic voltammograms (CVs) of  $\text{CH}_3\text{CH}_2\text{OH}$  and its deuteroderivatives ( $\text{CD}_3\text{CD}_2\text{OH}$ ,  $\text{CH}_3\text{CD}_2\text{OH}$  and  $\text{CD}_3\text{CH}_2\text{OH}$ ) on Pd electrode in 1 M NaOH solution containing 0.1 M alcohol at a scan rate of  $50 \text{ mV s}^{-1}$ .

To further understand the KIE of ethanol surface reaction, we compared the CVs between  $\text{CH}_3\text{CH}_2\text{OH}$  and its different deuteroderivatives in 1 M NaOH solution. As shown in Figure S1, the onset oxidation potentials show no clear shift, but their peak currents ( $I_p$ ) are obviously different. Namely, the  $I_p$  values for  $\text{CD}_3\text{CD}_2\text{OH}$  and  $\text{CH}_3\text{CD}_2\text{OH}$  are much smaller than those for  $\text{CH}_3\text{CH}_2\text{OH}$  and  $\text{CD}_3\text{CH}_2\text{OH}$ . Specially, we used  $I_p$  values to estimate the kinetic constants according to the following equations:

$$K_1 = [I_p(\text{CH}_3\text{CH}_2\text{OH}) - I_p(\text{NaOH})] / [I_p(\text{CD}_3\text{CD}_2\text{OH}) - I_p(\text{NaOH})] \quad (1)$$

$$K_2 = [I_p(\text{CH}_3\text{CH}_2\text{OH}) - I_p(\text{NaOH})] / [I_p(\text{CH}_3\text{CD}_2\text{OH}) - I_p(\text{NaOH})] \quad (2)$$

$$K_3 = [I_p(\text{CH}_3\text{CH}_2\text{OH}) - I_p(\text{NaOH})] / [I_p(\text{CD}_3\text{CH}_2\text{OH}) - I_p(\text{NaOH})] \quad (3)$$

The calculation results are  $K_1 = 7.64$ ,  $K_2 = 5.24$ ,  $K_3 = 0.99$ , respectively. The result of  $K_1 > K_2 \gg K_3$  indicates that the cleavage of  $\alpha\text{-C-H}$  rather than  $\beta\text{-C-H}$  plays an initial step for EOR at Pd electrode in alkaline media. Moreover, to some extent, it proves that adsorbed acetyl generated by  $\alpha\text{-C-H}$  cleavage is the key intermediate for EOR. This will be detailed discussed in our other publications.

### 3. The band-fitting of ATR-SEIRA Spectra

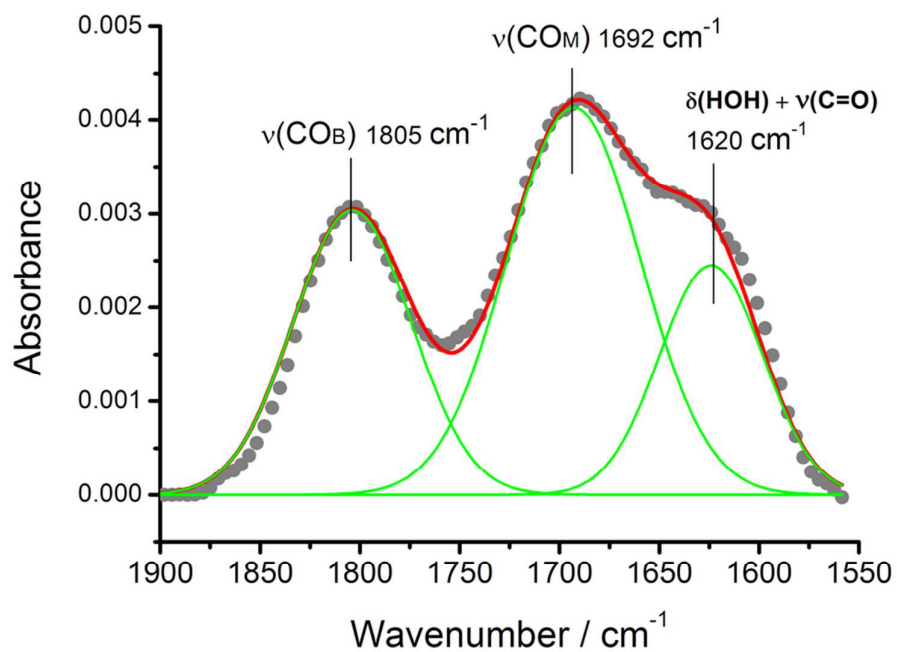

Figure S3. The Peak-fitting of ATR-SEIRA Spectra in Figure. 2B, taken the spectrum at -0.575 V (SCE) as example.
